# Supplementary material for: Synthesis of Cu(OH)2 and CuO nanotubes arrays on a silicon wafer
Source: Royal Society of Chemistry journal article supplement (doi:10.1039/c4ra10155c), 2014-12-15
Supplement: c4ra10155c1.pdf [file c4ra10155c1.pdf]

## Supplementary Information

### Synthesis of $\text{Cu}(\text{OH})_2$ and $\text{CuO}$ nanotubes arrays on a silicon wafer

Laurent Schlur, Karine Bonnot, Denis Spitzer

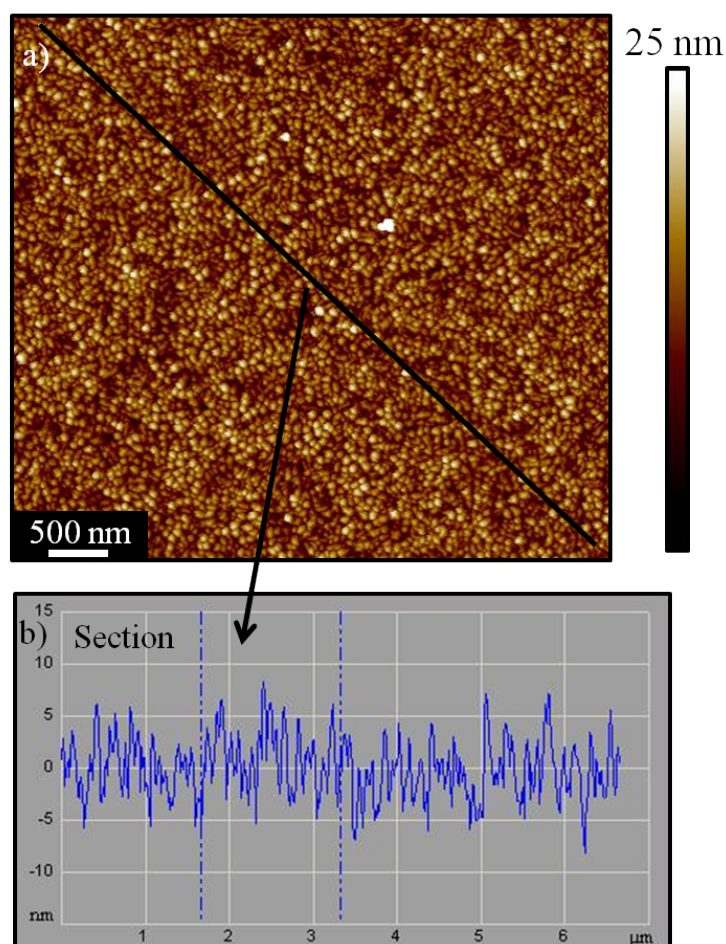

Fig.S1: **Roughness of the copper layer.** AFM a) image and b) cross section of the surface of the copper layer deposited on the top of a silicon wafer covered by 30 nm of titanium.

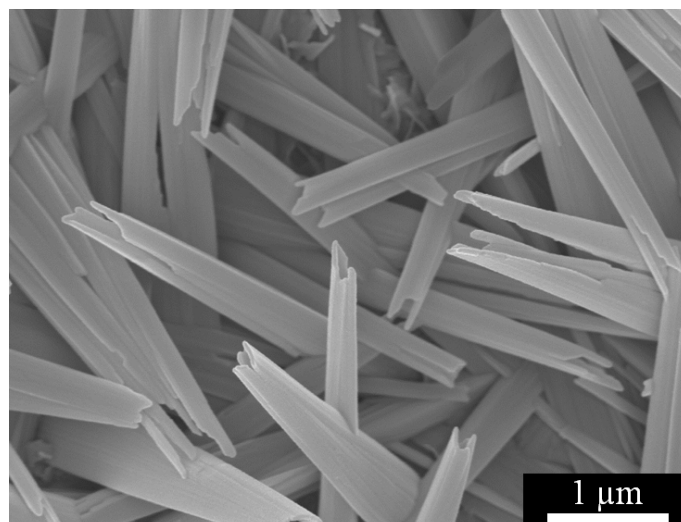

Fig.S2: **Growth of  $\text{Cu}(\text{OH})_2$  tubes by using only the first reaction.** SEM image of  $\text{Cu}(\text{OH})_2$  tubes grown on the copper layer when the wafer was exposed only to the first reaction during 5 hours.

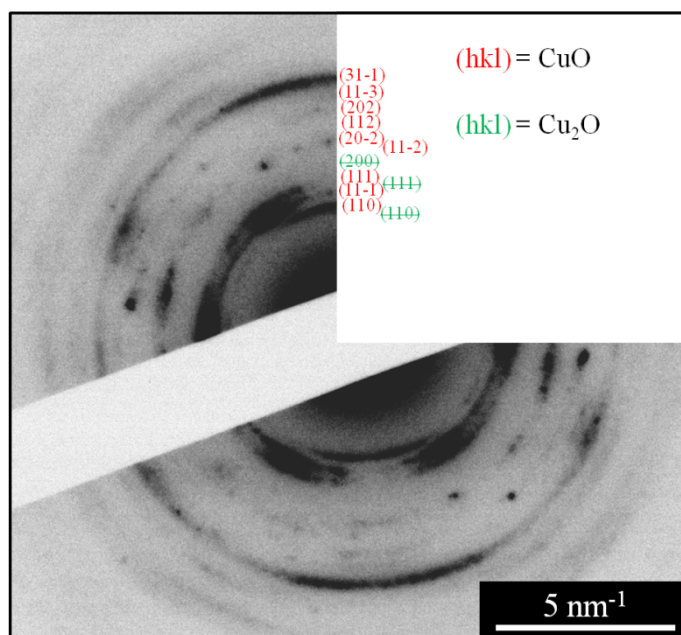

Fig.S3: **Origin of  $\text{Cu}_2\text{O}$  in the annealed samples.** Electronic diffraction of a single tube annealed under a  $\text{N}_2$  gas flow at 200°C during 1 h.
